# Supplementary material
Source: PubMed Central journal article supplement (PMC8652953)
Supplement: ANIE-60-23756-s001.pdf [file ANIE-60-23756-s001.pdf]

## Supporting Information

### **Polarity-Dominated Stable N97 Respirators for Airborne Virus Capture Based on Nanofibrous Membranes**

*Qifei Wang, Yingzhen Wei, Wenbo Li, Xizi Luo, Xinyue Zhang, Jiancheng Di, Guoqing Wang, and Jihong Yu\**

anie\_202108951\_sm\_miscellaneous\_information.pdf

**Table of Contents**

|                                                                                                                         |     |
|-------------------------------------------------------------------------------------------------------------------------|-----|
| 1. Experimental Procedures.....                                                                                         | S2  |
| 2. Fiber sizes of PAN nanofibers and cTFPNs.....                                                                        | S4  |
| 3. Surface geometries of PAN nanofibers and TFPNs with different terminal groups.....                                   | S4  |
| 4. Stability of TFPNMs in aprotic solvents.....                                                                         | S5  |
| 5. PMs capture capabilities over TFPNMs.....                                                                            | S5  |
| 6. Overall filtration performance of TFPNMs.....                                                                        | S6  |
| 7. Virus capture capability over cTFPNM and MEO-brand N95 FFR.....                                                      | S7  |
| 8. A 10-recycle evolution of cTFPNM characteristic upon various disinfection treatments.....                            | S7  |
| 9. Changes on the geometry of the MEO-brand N95 FFR upon solution-based disinfection treatments.....                    | S8  |
| 10. The surface tensions of TFPNMs estimated by OWRK method.....                                                        | S9  |
| 11. Surface polarity and stability of TFPNMs.....                                                                       | S9  |
| 12. Overall filtration performance of different respirator membranes.....                                               | S10 |
| 13. Disinfection treatments over cTFPNMs.....                                                                           | S10 |
| 14. Influence on filtration efficiency of multiple N95 FFRs upon various disinfection treatments after first cycle..... | S11 |
| 15. Influence on pressure drop of multiple N95 FFRs upon various disinfection treatments after first cycle.....         | S11 |
| 16. Estimation of the surface tension of TFPNMs.....                                                                    | S12 |
| 17. References.....                                                                                                     | S13 |
| 18. Author Contributions.....                                                                                           | S13 |

## SUPPORTING INFORMATION

## Experimental Procedures

## Materials and Methods

## Materials

Polyacrylonitrile (PAN, 150,000, 90%) was purchased from the Jilin Chemical Company (China). Dimethylformamide (DMF), hydrazine dihydrochloride were purchased from Beijing Chemical Company (China). 1,4-Dicyanobenzene (98%), and 4-cyanobenzoic acid (99%) were purchased from ACROS Organic Company (Belgium). 4-(Trifluoromethoxy)benzotrile (98%) was purchased from Aladdin Company (China). 4-Fluorophenylacetonitrile (97%) was purchased from ALFA Company (USA). 4-Aminobenzotrile (98%) was purchased from Innochem company (China). Hydrazine hydrate (80 wt%), and dimethyl sulfoxide (DMSO) were purchased from Tianjin Fuchen Chemical Company (China). Ethylene glycol, nitromethane and formamide were purchased from Beijing Chemical Company (China). The DMEM and fetal bovine serum (FBS, Gibico) were purchased from Invitrogen TM Co., Ltd (USA). The burning incense was purchased from Tongda manufacturing company (China).

## Sample preparation

The polyacrylonitrile nanofibrous membrane (PNM) was fabricated via the electrospinning technique based on our previous work. Typically, 1.0 g PAN was mixed with 9.0 g DMF solution containing 0.05 g water, then the mixture was stirred at 50 °C until the solid was completely dissolved. The precursor solution was loaded into the electrospinning system. The aluminum foil (5.0 × 5.0 cm) was used as the collector with electrospinning time and the working distance was kept at 30 min and 15 cm, respectively. Then the as-prepared PNM was subsequently followed by two post modification processes to achieve the alteration of surface terminal groups: (1) the preparation of 4-cyan-Ph-terminated thin-film coated PNM (CTFPNM); (2) the thin-film coatings with other terminal groups were fabricated on the as-prepared CTFPNM. All the experiment details were precisely recorded in our previous work.<sup>[1]</sup>

We chose multiple N95-grade FFRs for test: (1) Dräger X-plore 1095 (France, GB2626 KN95), (2) MEO (New Zealand, AS/NZS KN95), (3) KINLEED (China, GB2626 KN95), (4) 3Q (China, GB19083 N95) and (5) 3M 8210 (The United State, NOISH N95). All the samples were tested with a flow rate of 5 L/min.

## Charging

A 5 cm × 5 cm TFPNM was prepared for the injection of electrostatic charges. The demonstration is shown in Figure 1. The charging distance was kept as 30 mm for 5 min with a charging voltage at 16 kV. A 5-wire charging tip was self-made to inject electrostatic charges onto the membrane and insure the uniform distribution of the charges.

## Electrostatic charges measurement

The electrostatic charge quantity was measured by a hand-hold electrostatic fieldmeter (FMX-004, SIMCO, Japan). The tested distance was kept at 2cm. 10 samples were selected from each respirator membrane and 5 points were chosen on each sample to ensure the accuracy.

## PM simulation

The PM particulates were simulated by the smoke generated from the burning incense. The smoke PM particulates have a wide range in size from < 300 nm to > 10 μm.<sup>[2]</sup> The inflow concentration was controlled over 1000 μg/m<sup>3</sup> (PM<sub>2.5</sub> number density > 17650 per m<sup>3</sup>).

## Preparation of virus solutions

In this study, Coxsackie B4 virus (CV-B4) was used as provided by G. Wang, Pathogenic Microbiology Laboratory of Jilin University, China. Each virus solution was prepared by diluting 0.1 ml initial virus solution (CV-B4: TCID<sub>50</sub>= 10<sup>7</sup>/0.1 ml) into 50 ml deionized (DI) water. Moreover, all related experiments were performed inside a class II Biosafety Cabinet (BHC-1300IIB2, AIRTEC., China) in a BSL II laboratory.

## Filtration efficiency measurement

The filtration efficiency was calculated by comparing the PM/aerosols particulate number detected before and after the filtering for each filtration cycle (for 1 h), and the samples were subsequently tested and followed with a new cycle. The filtration processes were all conducted with an air flow at 5 L/min. 10 samples were selected from each respirator membrane and 5 spots were chosen on each sample to ensure the accuracy.

## Cytopathic effect and virus titration tests

HeLa cells were cultured in DMEM supplemented with 10% (v/v) fetal bovine serum (FBS) and penicillin (100 U/ml), streptomycin (100 μg/ml), in a humidified incubator with 5% carbon dioxide at 37 °C. In order to exclude the influence on viruses of aerosolization and experimental condition, especially the room humidity (RH), the viruses for further measurements were all collected after aerosolization with the same experimental condition at 23 °C ± 3 °C, 45 % ± 5 % RH.<sup>[3]</sup>

The cells with polyhedral morphology were grown in 96-well plates until reaching to 80% confluence. The viral aerosols before or after the filtration were collected by an All-Glass-Impinger (AGI-30) with 20 ml DMEM solution and 100 μl of the solution was added to replace the inoculum, and after 2 h at 37 °C, the viral solution was removed, and the cells were washed three times with DMEM, and then incubated in the DMEM containing 2% FBS for 5 days and then the cultures were observed by light microscope for viral cytopathic

## SUPPORTING INFORMATION

---

effects (CPE). The cytopathic changes occurred on the HeLa cells finally leading to shrinkage, rounding and a cell release from the monolayer.<sup>[4]</sup> A serial 10-fold dilution of the viral solution suspension was made and inoculated in eight wells of a 96-well plate at 37 °C, the dilution that causes cytopathology in half of the cultures (the median tissue culture infective dose, TCID<sub>50</sub>/ml) was observed and calculated after Spearman and Kaerber.<sup>[5]</sup>

### Heat treatment

All the samples were placed into a heating oven (SENXIN, DGG-9070B) at 80 °C for 30 min. Every sample was then tested within a filtration cycle for 1 h with NaCl aerosols (0.26 μm medium diameter). After filtering, the samples were replaced into the heating oven to start a new treatment cycle.

### Steam treatment

All the samples were placed on the top of a crystallizing dish filled of boiling water for 10 min, and the height between the samples and the water was controlled at 10 cm. The samples were subsequently tested and followed with a new treatment cycle.

### 75% Alcohol treatment

All the samples were immersed into 75% alcohol solution for 30 min and left until air dry. The samples were subsequently tested and followed with a new treatment cycle.

### Chlorine-based solution treatment

All the samples were uniformly sprayed with 1 ml domestic chlorine-based solution (containing 2% NaClO) and left to air dry. The samples were subsequently tested and followed with a new treatment cycle.

### UVGI

All the samples were placed into a Sterilization Cabinet, with a 254 nm, 8 W UV light. The distance between the samples and the UV light was kept at 15 cm. All the samples were irradiated for 30 min and placed for 30 min under ambient conditions, and then put into filtration test and subsequently followed with a new treatment cycle.

### Other characterizations

The morphologies of all the samples were studied by the scanning electron microscope (SEM, JSM-6510, Japan) and the transmission electron microscope (TEM, Tecnai G2 S-Twin F20, USA). The surface tensions and relative polar components of TFPNMs were analyzed by an optical contact angle meter (DSA100, KRUSS, Germany) at ambient conditions (temperature: 23-25 °C). The pressure drop across the air filters was recorded by a digital differential pressure gauge (AS510, Smart Sensor, China). PM mass concentration and NaCl aerosol number density were measured by a particle counter (DT-9880M, CEM, China). The static quantity was tested by an electrostatic fieldmeter (FMX-004, SIMCO, Japan). The collection of the filtered viral aerosols was conducted by an All-Glass-Impinger (AGI-30, SKC, USA). The preparation and aerosolization of viral solutions were conducted in a class II Biosafety Cabinet (BHC-1300IIB2, AIRTEC., China). The HeLa cells and Vero cells were cultured in a CO<sub>2</sub> cell culture shelves (SANYO Electric Co., Ltd, Japan) and the corresponding cell morphologies were observed by a light microscope (ECLIPSE Ts2, Nikon Co., Ltd, Japan).

## SUPPORTING INFORMATION

## Results and Discussion

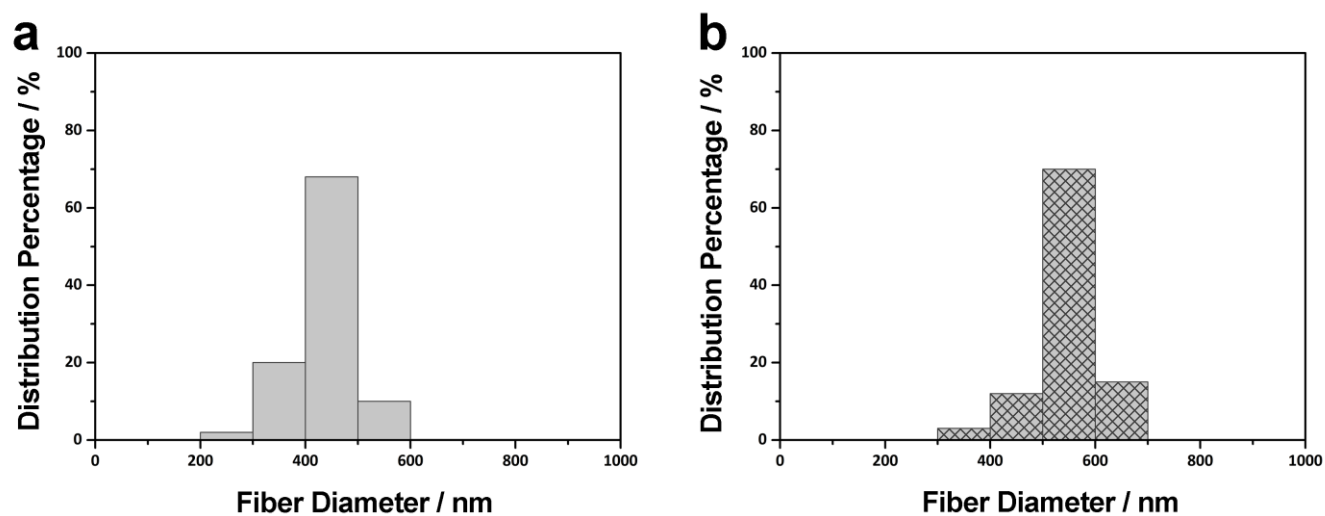

Figure S1. Distribution curves of the fiber diameters of a) PAN nanofibers and b) cTFPNs. The PAN fibers had a relatively uniform diameter at around 400-500 nm. After coating, the size of most cTFPNs increased to 500-600 nm.

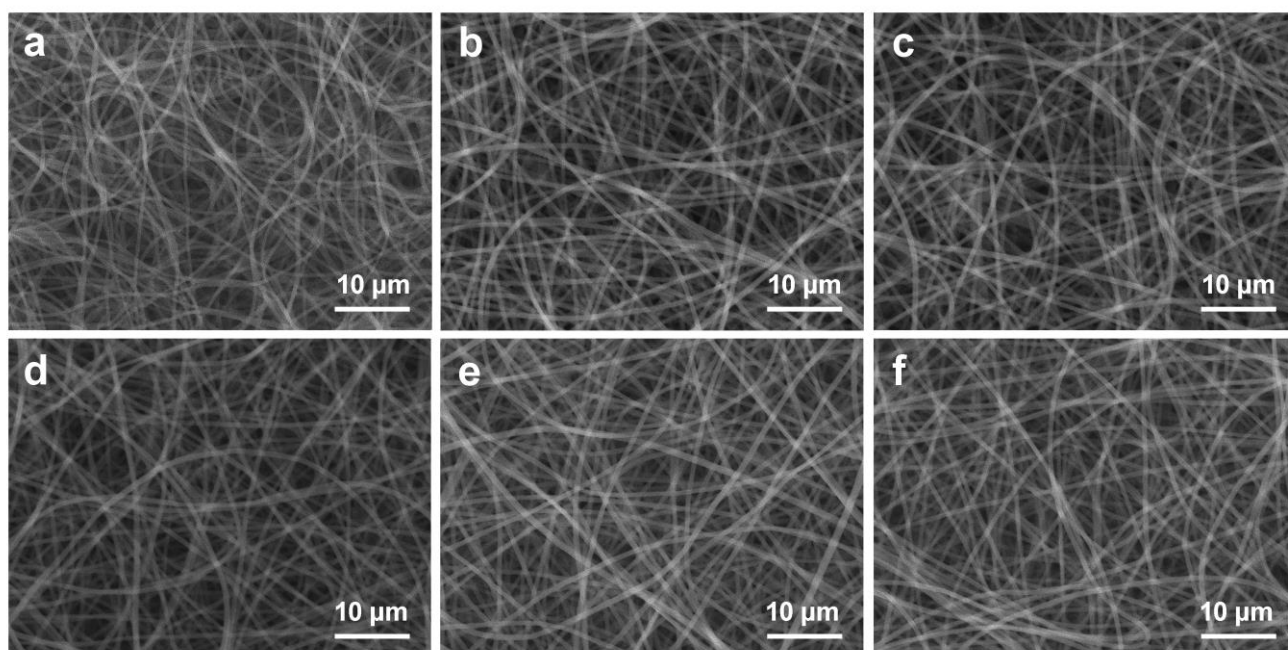

Figure S2. Surface geometries of PAN nanofibers and TFPNs with different terminal groups.

a) PAN nanofibers, b) 4-trifluoromethoxy-Ph-terminated TFPNs, c) 4-fluoro-Ph-terminated TFPNs, d) 4-amino-Ph-terminated TFPNs, e) 4-carboxyl-Ph-terminated TFPNs and f) 4-cyan-Ph-terminated TFPNs. The similar surface geometries with uniform fiber diameters suggest that there is no change occurred during the modification process.

## SUPPORTING INFORMATION

## a Before soaking

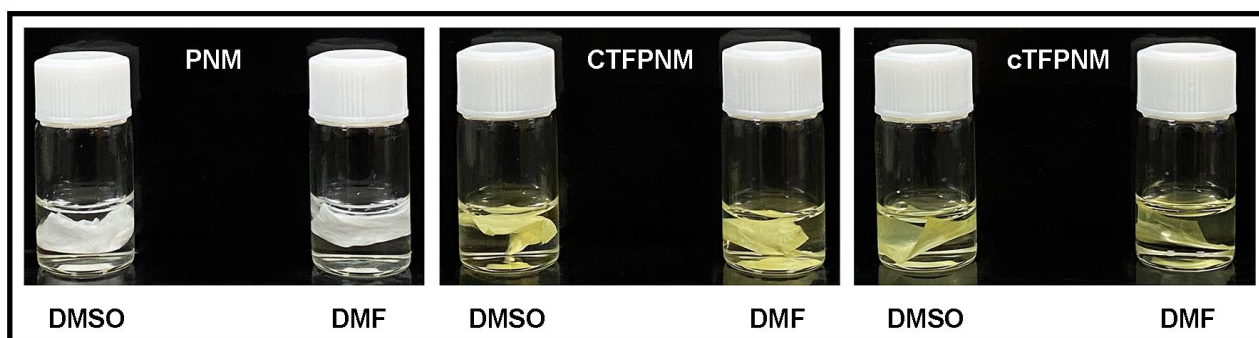

## b After soaking

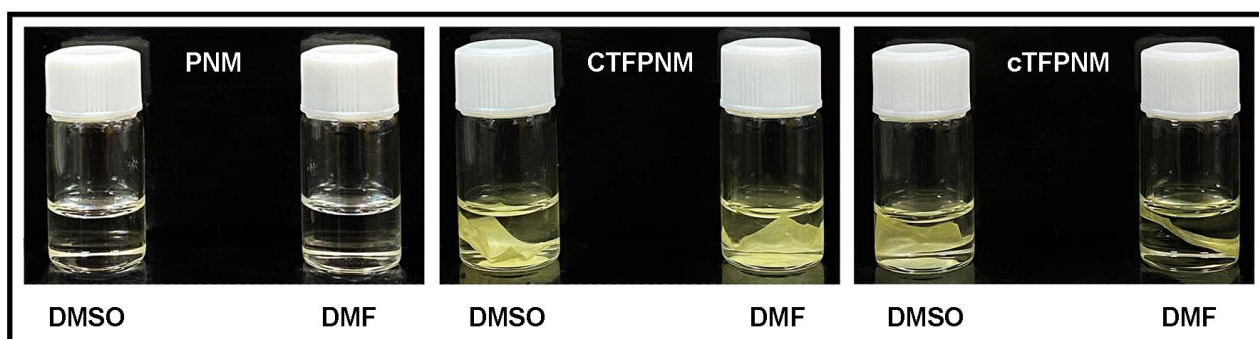

**Figure S3. Stability test of TFPNMs in aprotic solvents.** Stability of PNM and TFPNMs in dimethylformamide (DMSO, left bottle in all images) and dimethyl sulfoxide (DMF, right bottle in all images). The PNM was completely dissolved in both DMSO and DMF solutions within 5 min. However, the TF layer enhanced the stability of TFPNMs in the aprotic solvents, and the TFPNMs remained stable after soaking for 90 days.

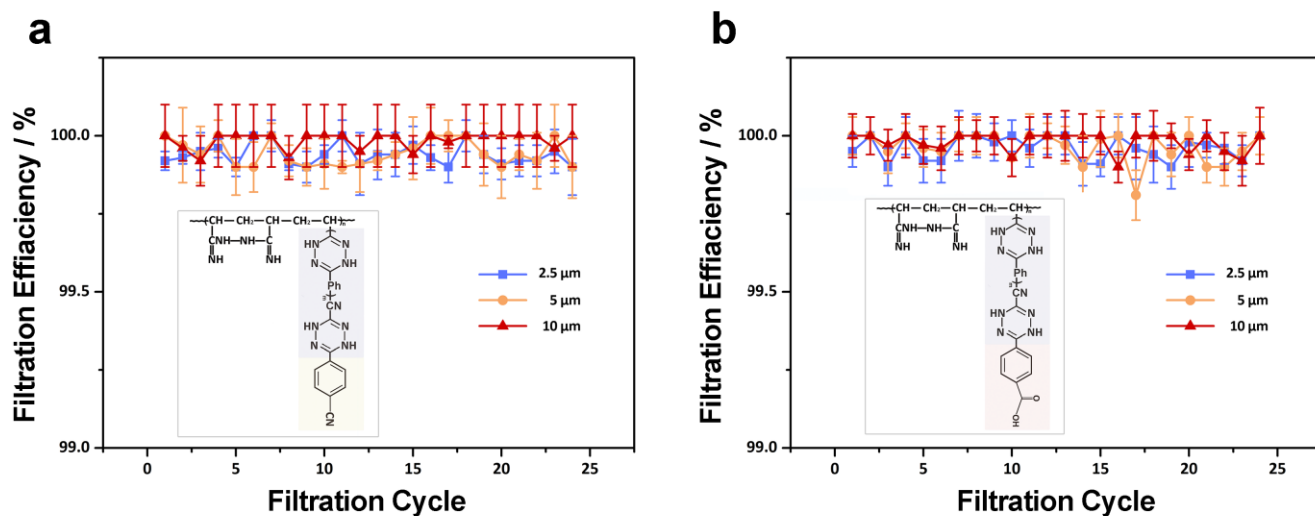

**Figure S4. PMs capture capabilities over TFPNMs.**

A 24 h evolution of filtration characteristics of a) CTFPNM and b) cTFPNM for  $PM_{10-2.5}$  at room temperature. Both highly polar TFPNMs showed FEs of  $PM_{10-2.5}$  over 99.90 %.

## SUPPORTING INFORMATION

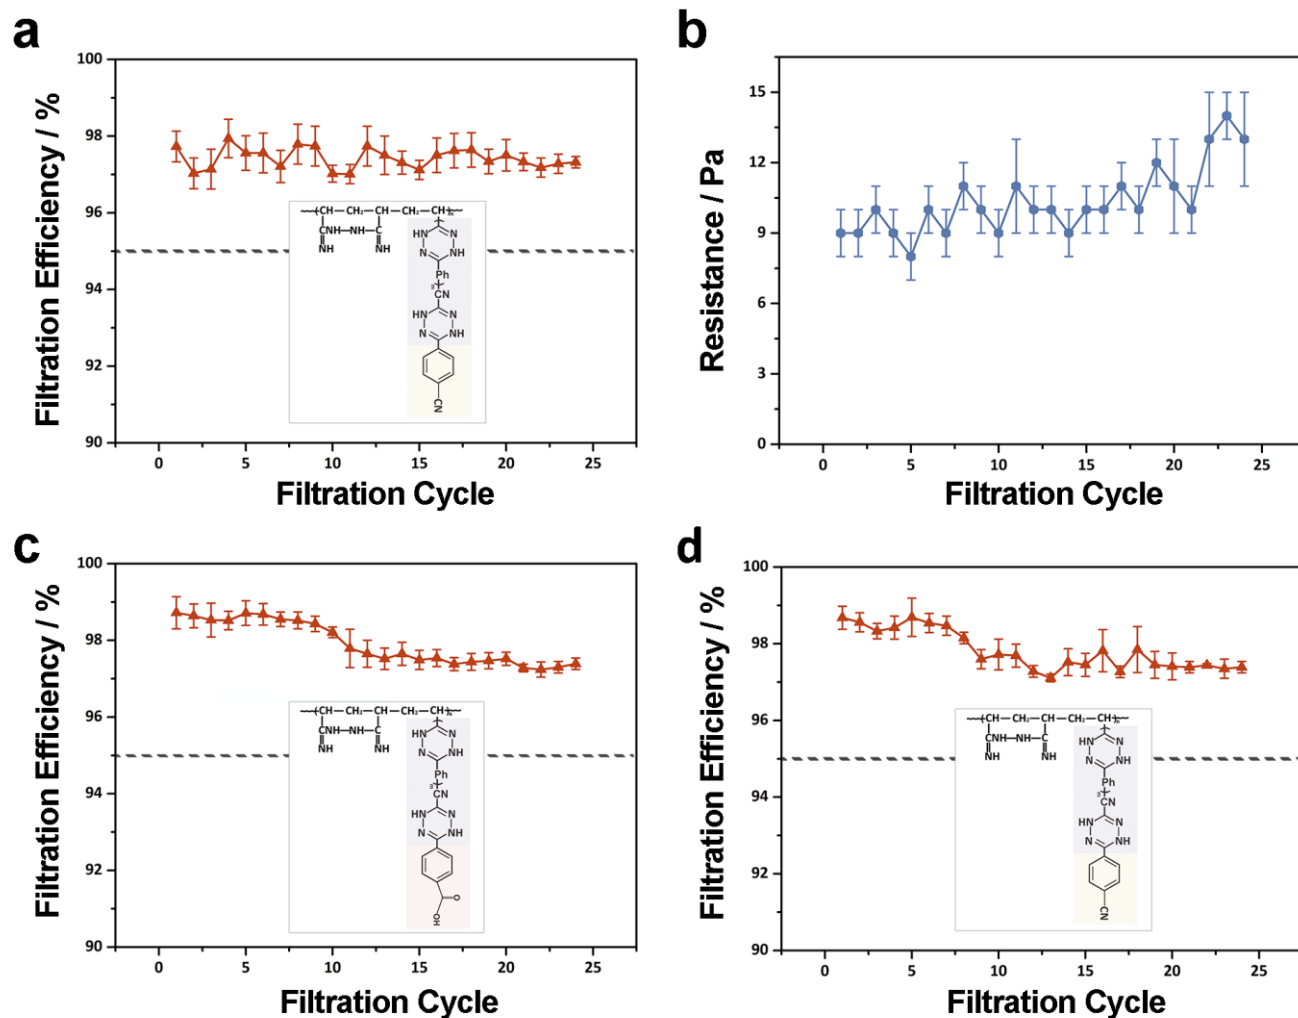

**Figure S5. Overall filtration performance of TFPNMs.**

A 24 h evolution of CTFPNM's filtration characteristics at room temperature, a) filtration efficiencies and b) pressure drop. A 24 h evolution of charged TFPNMs' filtration efficiencies at room temperature, including c) charged cTFPNM and d) charged CTFPNM.

## SUPPORTING INFORMATION

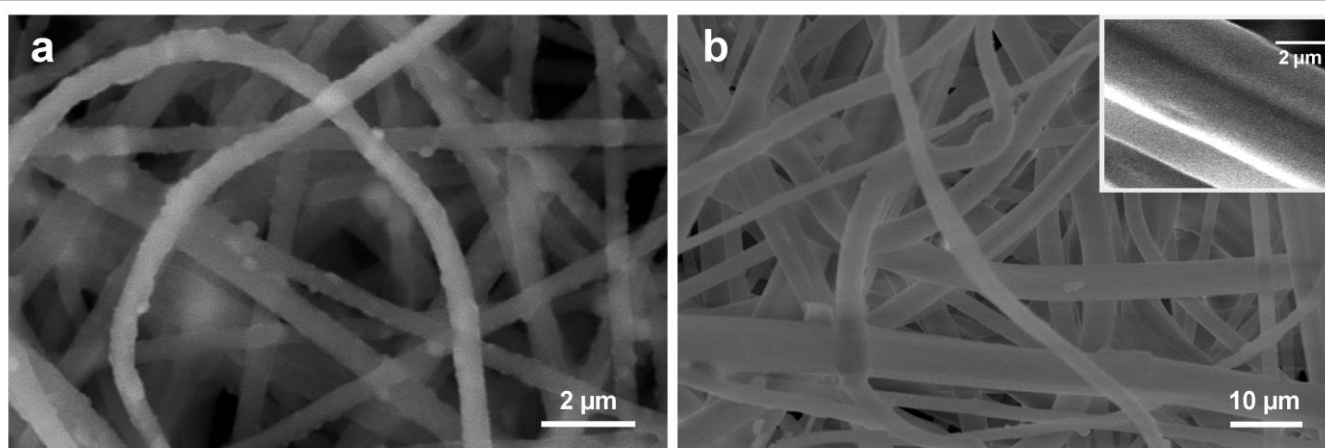

**Figure S6. Virus capture capability over a) cTFPNM and b) MEO-brand N95 FFR.** After 24 h filtering of CV-B4 viral aerosols, the cTFPNM had superior virus capture capability, fine particulates with sizes below 100 nm could be effectively captured. However, for the MEO-brand N95 FFRs, it could be barely observed teeny particulates on the PP fibers after 24 h filtering.

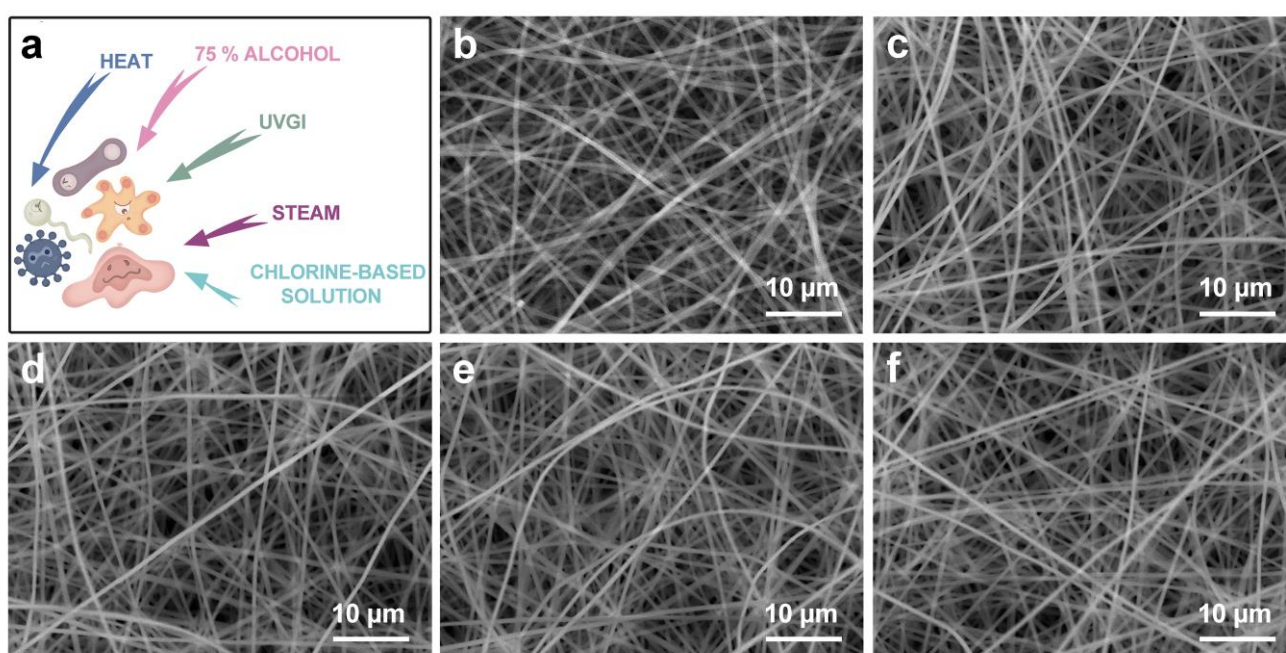

**Figure S7. A 10-recycle evolution of cTFPNM characteristic upon various disinfection treatments.**

a) The surface geometries of cTFPNMs upon various disinfection treatments are similar to that of the initial membrane, including b) heat treatment, c) steam treatment, d) 75% alcohol treatment, e) chlorine-based solution treatment and f) UVGI treatment. The pressure drops of cTFPNM could be maintained at 9-10 Pa, which also indicates the unchanged surface geometry.



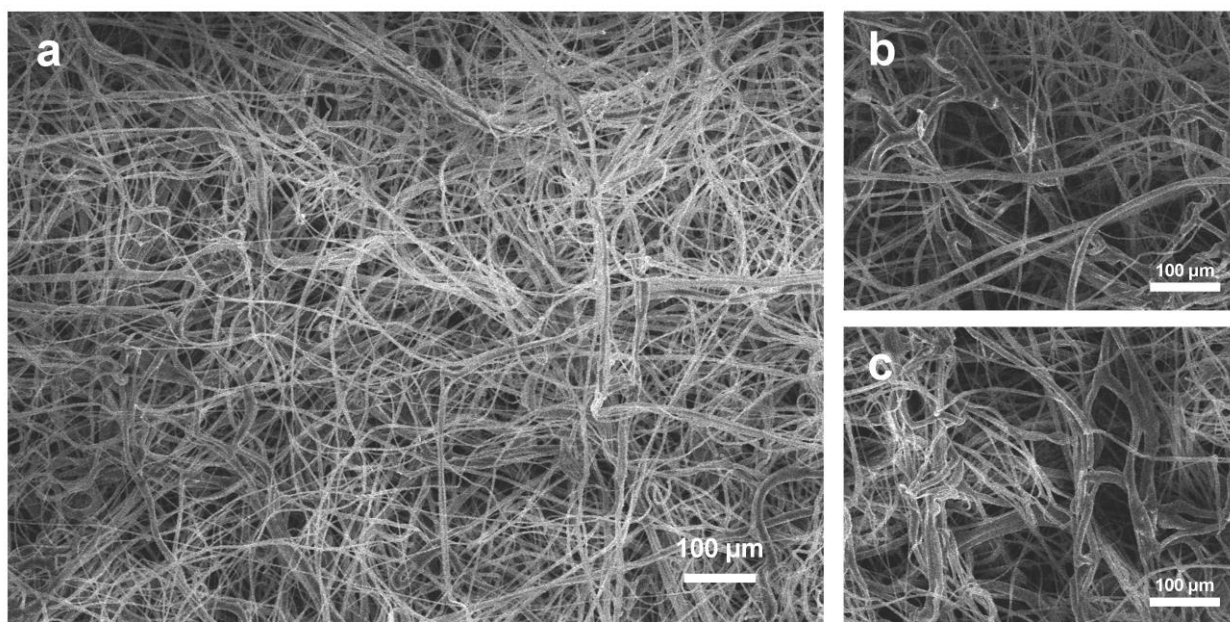

**Figure S8. Changes on the geometry of the MEO-brand N95 FFR upon solution-based disinfection treatments.**

A slight difference on the surface geometry could be observed between a) the initial MEO-brand N95 FFR and b) the alcohol treated, c) chlorine-based solution treated MEO-brand N95 FFRs. More large void spaces could be observed after the solution-based disinfection treatments, further resulting in the substantial degradation on FEs. The pressure drops of the solution-based methods treated FFRs also changed from 8 Pa to 10 Pa and 5 Pa.

## SUPPORTING INFORMATION

**Table S1.** The surface tension of TFPNMs estimated by OWRK method.

| TFPNMs                      | Molecular Formula of Terminal Groups                                              | $\gamma_S$ (mJ/m <sup>2</sup> ) [a] | $\gamma_S^p$ (mJ/m <sup>2</sup> ) [b] |
|-----------------------------|-----------------------------------------------------------------------------------|-------------------------------------|---------------------------------------|
| 4-Trifluoromethoxy-Ph-TFPNM | 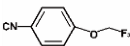 | 22.45                               | 2.99                                  |
| 4-Fluoro-Ph-TFPNM           |  | 25.61                               | 5.85                                  |
| 4-Amino-Ph-TFPNM            |  | 36.07                               | 21.53                                 |
| 4-Cyan-Ph-TFPNM             |  | 42.26                               | 31.96                                 |
| 4-Carboxyl-Ph-TFPNM         |  | 72.66                               | 66.09                                 |

Five liquids were used to increase the accuracy of the estimated results about surface tensions: water, ethylene glycol, dimethylformamide, nitromethane and formamide.

[a]  $\gamma_S$  represents the estimated result about the surface tension of an appointed TFPNM.

[b]  $\gamma_S^p$  represents the estimated result about the polar component of surface tension of an appointed TFPNM.

**Table S2.** Surface Polarity and Stability of TFPNMs.

| TFPNMs                      | Initial TFPNMs                      |                                       | Disinfected TFPNMs                  |                                       |
|-----------------------------|-------------------------------------|---------------------------------------|-------------------------------------|---------------------------------------|
|                             | $\gamma_S$ (mJ/m <sup>2</sup> ) [a] | $\gamma_S^p$ (mJ/m <sup>2</sup> ) [b] | $\gamma_S$ (mJ/m <sup>2</sup> ) [a] | $\gamma_S^p$ (mJ/m <sup>2</sup> ) [a] |
| 4-Trifluoromethoxy-Ph-TFPNM | 22.45                               | 2.99                                  | 22.96                               | 2.20                                  |
| 4-Fluoro-Ph-TFPNM           | 25.61                               | 5.85                                  | 26.05                               | 5.92                                  |
| 4-Amino-Ph-TFPNM            | 36.07                               | 21.53                                 | 35.15                               | 22.15                                 |
| 4-Cyan-Ph-TFPNM             | 42.26                               | 31.96                                 | 42.84                               | 32.04                                 |
| 4-Carboxyl-Ph-TFPNM         | 72.66                               | 66.09                                 | 72.72                               | 66.29                                 |

The data from all the samples represent the mean and standard deviation of 10 samples. The disinfected TFPNMs were displayed by five different disinfection treatments by the following order: 80 °C heat, steam, 75% alcohol, chlorine-based disinfecting water, UVGI.

[a]  $\gamma_S$  represents the estimated result about the surface tension of an appointed TFPNM.

[b]  $\gamma_S^p$  represents the estimated result about the polar component of surface tension of an appointed TFPNM.

## SUPPORTING INFORMATION

**Table S3.** Overall Filtration Performance of Different Respirator Membranes.

| Samples | First Filtration Cycle    |                    |                        | After 10 Filtration Cycles |                    |                        | After 24 Filtration Cycles |                    |                        |
|---------|---------------------------|--------------------|------------------------|----------------------------|--------------------|------------------------|----------------------------|--------------------|------------------------|
|         | Filtration Efficiency (%) | Pressure Drop (Pa) | QF (Pa <sup>-1</sup> ) | Filtration Efficiency (%)  | Pressure Drop (Pa) | QF (Pa <sup>-1</sup> ) | Filtration Efficiency (%)  | Pressure Drop (Pa) | QF (Pa <sup>-1</sup> ) |
| cTFPNM  | 97.75                     | 9                  | 0.42                   | 97.72                      | 11                 | 0.34                   | 97.42                      | 13                 | 0.28                   |
| CTFPNM  | 97.73                     | 9                  | 0.42                   | 97.68                      | 11                 | 0.34                   | 97.39                      | 13                 | 0.28                   |
| Dräger  | 96.31                     | 14                 | 0.24                   | 95.17                      | 18                 | 0.16                   | 94.67                      | 25                 | 0.11                   |
| MEO     | 96.37                     | 8                  | 0.41                   | 95.95                      | 12                 | 0.26                   | 94.84                      | 15                 | 0.19                   |
| KINLEED | 95.25                     | 14                 | 0.22                   | 94.66                      | 17                 | 0.17                   | 92.66                      | 24                 | 0.10                   |
| 3Q      | 96.25                     | 15                 | 0.22                   | 95.33                      | 18                 | 0.17                   | 94.89                      | 25                 | 0.12                   |
| 3M      | 96.42                     | 32                 | 0.10                   | 95.05                      | 38                 | 0.08                   | 93.94                      | 46                 | 0.06                   |

The data from the samples characterized with a flow rate of 5 L/min and NaCl aerosols represent the mean and standard deviation of 10 samples. All the data are related to the initial filtration characteristics and the corresponding characteristics after 10 and 24 filtration cycles, respectively.

**Table S4.** Disinfection Treatments over cTFPNMs.

| Treatment                     | Treatment Mode        | Treatment Time (min)  | Filtration Efficiency (%) | Pressure Drop ( $\Delta P$ /Pa) |
|-------------------------------|-----------------------|-----------------------|---------------------------|---------------------------------|
| Initial Sample                |                       |                       | 97.73±0.25                | 10.0±1.0                        |
| Dry Heat (80 °C)              | Heat Oven             | 30                    | 97.65±0.22                | 9.0±1.0                         |
| Steam                         | Boiling Water         | 10                    | 97.42±0.26                | 9.0±1.0                         |
| Alcohol (75 %)                | Immersion             | 30<br>(Until Air Dry) | 97.45±0.44                | 10.0±1.0                        |
| Chlorine-based Solution (2 %) | Spray and Immersion   | 10<br>(Until Air Dry) | 97.56±0.48                | 11.0±1.0                        |
| UVGI (254 nm, 8 W)            | Sterilization Cabinet | 30                    | 97.33±0.13                | 9.0±1.0                         |

The data from the samples displayed upon five different disinfection treatments represent the mean and standard deviation of 10 samples.

## SUPPORTING INFORMATION

**Table S5.** Influence on filtration efficiency of multiple N95 FFRs upon various disinfection treatments after first cycle.

| Treatments                         | Filtration Efficiency (%) |            |            |            |            |
|------------------------------------|---------------------------|------------|------------|------------|------------|
|                                    | Dräger                    | MEO        | KINLEED    | 3Q         | 3M         |
| Initial Sample<br>(Corona Charged) | 96.31±0.25                | 96.37±0.2  | 95.25±0.3  | 96.25±0.22 | 96.42±0.4  |
| Dry Heat (80 °C)                   | 96.20±0.18                | 96.30±0.26 | 95.45±0.30 | 96.41±0.35 | 96.35±0.28 |
| Steam                              | 95.41±0.30                | 95.32±0.25 | 94.41±0.20 | 95.32±0.22 | 92.94±0.20 |
| Ethanol (75 %)                     | 78.95±0.55                | 68.58±0.55 | 77.26±0.25 | 76.03±0.15 | 73.35±0.35 |
| Chlorine-based (2 %)               | 69.10±0.15                | 57.33±0.24 | 87.15±0.23 | 71.21±0.25 | 76.02±0.10 |
| UVGI<br>(254 nm, 8 W)              | 93.82±0.65                | 96.28±0.25 | 95.41±0.35 | 96.60±0.60 | 96.54±0.48 |

The data from the samples displayed upon five different disinfection treatments represent the mean and standard deviation of 10 samples.

**Table S6.** Influence on pressure drop of multiple N95 FFRs upon various disinfection treatments after first cycle.

| Treatments                         | Pressure Drop (Pa) |      |         |      |      |
|------------------------------------|--------------------|------|---------|------|------|
|                                    | Dräger             | MEO  | KINLEED | 3Q   | 3M   |
| Initial Sample<br>(Corona Charged) | 14±1               | 8±1  | 14±1    | 15±1 | 32±1 |
| Dry Heat (80 °C)                   | 13±2               | 9±1  | 15±2    | 15±1 | 34±2 |
| Steam                              | 14±1               | 8±1  | 15±1    | 13±1 | 37±2 |
| Ethanol (75 %)                     | 14±2               | 10±1 | 12±1    | 14±1 | 34±2 |
| Chlorine-based (2 %)               | 9±1                | 5±1  | 16±1    | 12±1 | 37±2 |
| UVGI<br>(254 nm, 8 W)              | 16±2               | 6±1  | 13±2    | 15±2 | 35±2 |

The data from the samples displayed upon five different disinfection treatments represent the mean and standard deviation of 10 samples.

## SUPPORTING INFORMATION

## Note S1. Estimation of the Surface Tension of TFPNMs

The surface tension of the TFPNMs was estimated by the OWRK method (Owen, Wendt, Rabel and Kael).<sup>[6]</sup> It simply depends on the contact angle of two different kinds of liquids, which can estimate the surface tension of solids and develop the corresponding dispersion and polar interfacial attractions.

Work of adhesion on the interface of solid surface and liquid can be divided into two parts: polar and dispersion. As suggested by Fowkes, the attractive forces at solid surface can be contributed by the polar and dispersive interfacial attractions, and the polar-dispersive interactions can be negligible.

$$W_a = \gamma_S + \gamma_L - \gamma_{SL} \quad \text{eq. S1}$$

$$W_a = W_a^d + W_a^p = 2(\sqrt{\gamma_S^d \gamma_L^d} + \sqrt{\gamma_S^p \gamma_L^p}) \quad \text{eq. S2}$$

In particular, the equation S2 could be combined with equation S1 based on the Young's equation (eq. S3), when contact angle  $\theta > 0$ ,

$$\cos\theta = \frac{\gamma_S - \gamma_{SL}}{\gamma_L} \quad \text{eq. S3}$$

By further concise equations with measurable quantities, we have,<sup>[7]</sup>

$$2 \frac{\gamma_L (1 + \cos\theta)}{\sqrt{\gamma_L^d}} = \sqrt{\gamma_S^d} + \sqrt{\gamma_S^p} \frac{\sqrt{\gamma_L^p}}{\sqrt{\gamma_L^d}} \quad \text{eq. S4}$$

In the OWRK method,  $\gamma_S^d$  and  $\gamma_S^p$  can be estimated with two liquids or more, for example, water ( $\gamma_L^d = 21.8 \text{ mJ/m}^2$ ,  $\gamma_L^p = 51.0 \text{ mJ/m}^2$ ) and formamide ( $\gamma_L^d = 39.5 \text{ mJ/m}^2$ ,  $\gamma_L^p = 18.7 \text{ mJ/m}^2$ ).

When the calculated results fulfill the above eq. S4, the  $\gamma_S^d$  and  $\gamma_S^p$  of different solid surfaces could be estimated. In our work, five liquids are used to increase the accuracy of the estimated results about surface tensions: water, ethylene glycol, dimethylformamide, nitromethane and formamide.

In the above note, the  $W_a$  refers to the work of adhesion,  $W_a^d$  and  $W_a^p$  are the dispersion and polar components of  $W_a$ .  $\gamma_S$  and  $\gamma_L$  are the solid and liquid surface tension, respectively, and the  $\gamma_{SL}$  is the interfacial tension.  $\gamma_S^d$  and  $\gamma_L^d$  represent the dispersion component of  $\gamma_S$  and  $\gamma_L$ .  $\gamma_S^p$  and  $\gamma_L^p$  represent the polar component of  $\gamma_S$  and  $\gamma_L$ .  $\theta$  refers to the specific liquid-solid contact angle.

## SUPPORTING INFORMATION

## References

- [1] Q. Wang, Y. Wang, B. Wang, Z. Liang, J. Di, J. Yu, *Chem. Sci.* **2019**, *10*, 6382-6389.
- [2] T. C. Lin, G. Krishnaswamy, D. S. Chi, *Clin. Mol. Allergy* **2008**, *6*, 3.
- [3] N. Turgeon, M. J. Toulouse, B. Martel, S. Moineau, C. Duchaine, *Appl. Environ. Microbiol.* **2014**, *80*, 4242-4250.
- [4] C. M. Carthy, D. J. Granville, K. A. Watson, D. R. Anderson, J. E. Wilson, D. Yang, D. W. C. Hunt, B. M. McManus, *J. Virol.* **1998**, *72*, 7669-7675.
- [5] a) G. Kärber, *Arch. Exp. Path. Pharmacol.* **1931**, *162*, 480-483; b) C. Lei, J. Yang, J. Hu, X. Sun, *Viol. Sin.* **2021**, *36*, 141-144.
- [6] a) D. K. Owens, R. C. Wendt, *J. Appl. Polym. Sci.* **1969**, *13*, 1741-1747; b) D. H. Kaelble, *J. Adhes.* **2008**, *2*, 66-81.
- [7] Y. Wang, J. Di, L. Wang, X. Li, N. Wang, B. Wang, Y. Tian, L. Jiang, J. Yu, *Nat. Commun.* **2017**, *8*, 575.

## Author Contributions

J.H.Y. conceived and designed the project. Q.F.W. carried out the overall performance experiments and related analysis. Y.Z.W. and W.B.L. helped with the filtration characteristic experiments and the pressure drop analysis. J.C.D. participated in some discussion. G.Q.W. conducted the cytopathic effect and virus titration tests, Q.F.W., X.Z.L. and X.Y.Z. carried out the relative experiments to evaluate the virus filtration characteristics. Q.F.W. wrote the manuscript, and J.H.Y. revised the manuscript.
